# Supplementary material for: Manipulation of an α-glucosidase in the industrial glucoamylase-producing Aspergillus niger strain O1 to decrease non-fermentable sugars production and increase glucoamylase activity
Source: Frontiers journal article supplement (doi:10.3389/fmicb.2022.1029361), 2022-10-20
Supplement: Data_Sheet_2.xlsx [file Data_Sheet_2.xlsx]

## Sheet: Sheet1
Secretomes of 6-day supernatants of fermentation cultures from strain O1, agdB single KO strains，and agdA/agdB double KO strains.
Protein IDs	Mol. weight [kDa]	LFQ intensity strain O1	LFQ intensity ΔagdB-13	LFQ intensity ΔagdB-23	LFQ intensity ΔAΔB-18	LFQ intensity ΔAΔB-21	LFQ intensity ΔAΔB-48
tr|A2QHE1|A2QHE1_ASPNC	68.308	116100000	1.60891e+08	1.30987e+08	1.01143e+08	1.53869e+08	1.31617e+08
tr|A2QL05|A2QL05_ASPNC	54.678	52084000	1.61971e+07	4.1745e+07	4.66396e+07	3.36009e+07	3.98726e+07
tr|A2QW02|A2QW02_ASPNC	55.238	39572000	2.79528e+07	3.31926e+07	3.75822e+07	2.1318e+07	3.07628e+07
tr|A2QHB3|A2QHB3_ASPNC	61.33	5144900	3.87235e+06	8.52868e+06	1.06885e+07	7.43533e+06	1.03e+07
tr|A2QAC1|A2QAC1_ASPNC	96.934	3848800	0	0	0	0	0
sp|A2QWU9|MANBA_ASPNC	104.03	2984700	6.52172e+06	2.65095e+06	5.37129e+06	2.8651e+06	3.89984e+06
tr|A2Q7Q4|A2Q7Q4_ASPNC;tr|A2Q7T0|A2Q7T0_ASPNC	80.215	2386400	5.94363e+06	4.21645e+06	6.46705e+06	4.20308e+06	6.27041e+06
tr|A2QL74|A2QL74_ASPNC	64.489	1986200	1.0883e+06	2.24653e+06	1.82846e+06	246985	537245
sp|A2QEJ9|AGALB_ASPNC	48.826	1522500	5.05264e+06	3.10309e+06	6.37322e+06	2.29497e+06	4.62036e+06
tr|A2QR21|A2QR21_ASPNC	58.705	1268800	721634	862561	1.06221e+06	1.05698e+06	1.04776e+06
tr|A2QHW0|A2QHW0_ASPNC	41.051	1155500	656592	1.1354e+06	1.57847e+06	1.13052e+06	1.17738e+06
tr|A2QCT2|A2QCT2_ASPNC	58.129	1048000	115827	94980.3	482751	0	269404
tr|A2Q7S3|A2Q7S3_ASPNC	70.07	820690	138076	264847	347620	147535	236650
tr|A2QFZ2|A2QFZ2_ASPNC	65.027	707710	616061	709710	885041	858457	1.09403e+06
tr|A2QH44|A2QH44_ASPNC	27.036	580240	208602	0	447431	318169	0
tr|A2QUZ1|A2QUZ1_ASPNC	48.465	528680	306298	632377	648932	0	451877
sp|A2R0E0|INUE_ASPNC	59.15	486030	225769	358381	214552	94195.6	159671
tr|A2QBI7|A2QBI7_ASPNC	63.123	480900	605137	282401	666145	573742	18828.5
tr|A2R628|A2R628_ASPNC	135.82	417630	416391	1.29056e+06	309142	369658	272904
tr|A2QSZ8|A2QSZ8_ASPNC	65.371	307320	0	4697.49	75682.8	266016	140082
tr|A2QV29|A2QV29_ASPNC	43.521	270130	244634	38746.2	311442	138448	149620
tr|A2QP32|A2QP32_ASPNC	59.535	268750	0	110693	0	0	0
tr|A2QBC2|A2QBC2_ASPNC	41.645	258260	1.42516e+06	1.16613e+06	1.57988e+06	1.5561e+06	702284
tr|A5ABB5|A5ABB5_ASPNC	38.08	249630	116424	207396	167294	235196	275444
tr|A2QH12|A2QH12_ASPNC	62.599	238860	865729	404173	385478	1.2532e+06	1.16207e+06
tr|A2QAC9|A2QAC9_ASPNC	39.886	220630	0	319508	96148.7	515168	0
tr|A2R1U6|A2R1U6_ASPNC	58.765	211090	69436.1	66471.1	75226.5	0	45495.4
tr|A2R322|A2R322_ASPNC	25.873	189200	22690.4	417797	243119	341220	201862
sp|A2QAN3|BGALA_ASPNC	109.71	178680	89106.8	33192.6	408131	60715.8	70174.6
sp|A2QP30|LIS1_ASPNC	48.638	166910	0	0	0	551647	0
sp|A2QL72|AGALA_ASPNC	59.212	157940	354815	132912	492517	138301	142573
sp|A2QH21|EGLC_ASPNC	46.346	153420	454235	722492	339114	0	121910
tr|A2QSK6|A2QSK6_ASPNC	63.634	151120	103860	114138	188979	104577	336458
tr|A2R2Z3|A2R2Z3_ASPNC	65.699	126630	241776	266366	327012	237011	150571
tr|A2Q7E3|A2Q7E3_ASPNC	42.757	126010	0	0	41180	0	0
tr|A2QZS1|A2QZS1_ASPNC	62.927	98698	147757	116453	64241.5	0	158864
tr|A2QFW8|A2QFW8_ASPNC	47.19	90632	0	76598.9	163751	41777.1	0
tr|A2QT39|A2QT39_ASPNC;tr|A2QHA8|A2QHA8_ASPNC	56.757	89993	104764	169728	107050	177100	92799.4
tr|A5AAJ6|A5AAJ6_ASPNC	50.831	86865	0	0	123217	64461.3	0
tr|A2QL34|A2QL34_ASPNC	69.204	63407	66093.7	0	0	0	0
tr|A2QA87|A2QA87_ASPNC	29.209	55134	0	0	0	0	0
tr|A2QJY8|A2QJY8_ASPNC	58.976	38409	144776	101388	272361	46379.5	79675.2
tr|A2QW39|A2QW39_ASPNC	61.29	37292	0	0	176369	75212.1	89949
tr|A2QF50|A2QF50_ASPNC	100.71	35319	59772.8	0	27396.7	0	0
tr|A2RAC6|A2RAC6_ASPNC	72.472	31144	0	0	40192.5	28264.5	0
tr|A2QYT9|A2QYT9_ASPNC	60.844	26726	1954.08	45837.1	34269.2	0	160814
tr|A2QJI1|A2QJI1_ASPNC	40.648	25145	0	5159.55	0	0	0
tr|A2Q9V3|A2Q9V3_ASPNC	44.675	25102	0	51927.4	0	118824	0
tr|A2R6F9|A2R6F9_ASPNC	61.387	25048	0	0	13746.2	46498.6	8044.84
tr|A2QGH4|A2QGH4_ASPNC	60.932	19951	22318.3	0	207908	0	39843.3
tr|A5ABE5|A5ABE5_ASPNC	62.823	14718	0	0	0	0	0
tr|A2QUX1|A2QUX1_ASPNC	58.357	10496	20075.2	11080	13605.6	15156.4	0
tr|A2QYN8|A2QYN8_ASPNC	53.875	8618.3	0	0	12332.3	40524	29328.6
tr|A2QF85|A2QF85_ASPNC	18.149	8458.6	4570.73	13630.1	18185.3	0	0
tr|A2QAR4|A2QAR4_ASPNC	48.386	4984.3	0	0	0	0	0
sp|A2QA27|XYND_ASPNC	87.21	0	0	0	0	36868.2	0
sp|A2RAL4|BGLA_ASPNC	93.228	0	0	0	0	0	0
tr|A2Q7Q3|A2Q7Q3_ASPNC	116.17	0	26792.6	0	0	20972.5	0
tr|A2Q9H0|A2Q9H0_ASPNC	33.044	0	0	0	0	0	0
tr|A2QAR3|A2QAR3_ASPNC	98.797	0	0	12450	0	0	0
tr|A2QBK4|A2QBK4_ASPNC	37.623	0	0	0	0	0	0
tr|A2QFW4|A2QFW4_ASPNC	73.119	0	36021.4	79487.2	98702.4	198990	132140
tr|A2QG36|A2QG36_ASPNC	23.874	0	36928	23576.6	19456.4	0	0
tr|A2QJF8|A2QJF8_ASPNC	57.938	0	0	0	0	0	0
tr|A2QKY4|A2QKY4_ASPNC	68.04	0	0	0	0	0	71127
tr|A2QLC7|A2QLC7_ASPNC	29.732	0	144972	0	95477	425910	0
tr|A2QQH9|A2QQH9_ASPNC	39.514	0	0	0	0	0	0
tr|A2QR36|A2QR36_ASPNC	62.129	0	0	0	0	0	0
tr|A2QSK3|A2QSK3_ASPNC	52.486	0	0	31582.5	0	0	20900.8
tr|A2QSZ9|A2QSZ9_ASPNC	13.199	0	0	0	0	0	0
tr|A2QT90|A2QT90_ASPNC	68.642	0	0	0	0	0	0
tr|A2QTS4|A2QTS4_ASPNC	60.941	0	0	100910	108320	0	129546
tr|A2QVQ4|A2QVQ4_ASPNC	64.134	0	0	0	0	0	0
tr|A2R0G8|A2R0G8_ASPNC	68.548	0	0	0	0	0	0
tr|A2R1M4|A2R1M4_ASPNC	67.267	0	0	15072.7	0	15666.8	0
tr|A2R2W1|A2R2W1_ASPNC	53.018	0	0	0	0	0	0
tr|A2R416|A2R416_ASPNC	83.145	0	0	0	8.10475e+06	0	0
tr|A2R5J7|A2R5J7_ASPNC	27.947	0	0	0	0	0	4746.36
tr|A2R5R4|A2R5R4_ASPNC	75.081	0	0	0	0	0	0
tr|A2R765|A2R765_ASPNC	56.946	0	0	33364.3	0	0	35710
tr|A2R7A6|A2R7A6_ASPNC	44.942	0	859903	0	0	0	0
tr|A2R906|A2R906_ASPNC	61.296	0	0	0	26327.1	61551.2	33540
LFQ, label-free quantification
